# Supplementary material for: Yellow fever surveillance suggests zoonotic and anthroponotic emergent potential
Source: PubMed Central journal article supplement (PMC9163115; doi:10.1038/s42003-022-03492-9), 2022-06-02
Supplement: 42003_2022_3492_MOESM3_ESM.pdf [file 42003_2022_3492_MOESM3_ESM.pdf]

## Description of Additional Supplementary Files

**File name:** Supplementary Data 1

**Description:** List of sources of yellow fever case reports for the period 1970-2020.

**File name:** Supplementary Data 2

**Description:** Occurrence of yellow fever case reports in the spatial units used for modelling (i.e., in 7,774-km<sup>2</sup> hexagons). Geographic coordinates of hexagon centroids are shown.
